# Supplementary material for: Crystal structure of PXY-TDIF complex reveals a conserved recognition mechanism among CLE peptide-receptor pairs
Source: PubMed Central journal article supplement — Cell Res. 2016 Apr 8;26(5):543–55. doi: 10.1038/cr.2016.45 (PMC4856767; doi:10.1038/cr.2016.45), 2016-04-08
Supplement: cr201645x1.pdf [file cr201645x1.pdf]

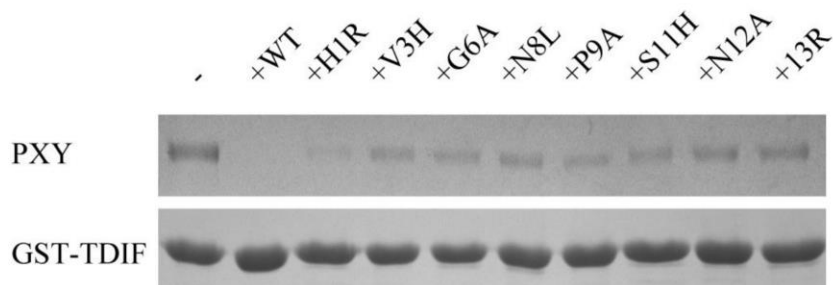

**Supplementary information, Figure S1** Competition assay of PXY<sup>LRR</sup> by GST-TDIF in the absence (-) or presence of excess synthetic TDIF or its mutants. The mixture containing chemically synthesized wild-type TDIF or its mutants and the purified PXY<sup>LRR</sup> was flowed through GS4B resin bound by GST-TDIF, respectively. After extensive washing, the GS4B resin-bound proteins were analyzed by SDS-PAGE and detected by Coomassie blue staining. 13R had an additional arginine added at the C terminus of TDIF.
