# Supplementary material for: Crystal structure of PXY-TDIF complex reveals a conserved recognition mechanism among CLE peptide-receptor pairs
Source: PubMed Central journal article supplement — Cell Res. 2016 Apr 8;26(5):543–55. doi: 10.1038/cr.2016.45 (PMC4856767; doi:10.1038/cr.2016.45), 2016-04-08
Supplement: cr201645x2.pdf [file cr201645x2.pdf]

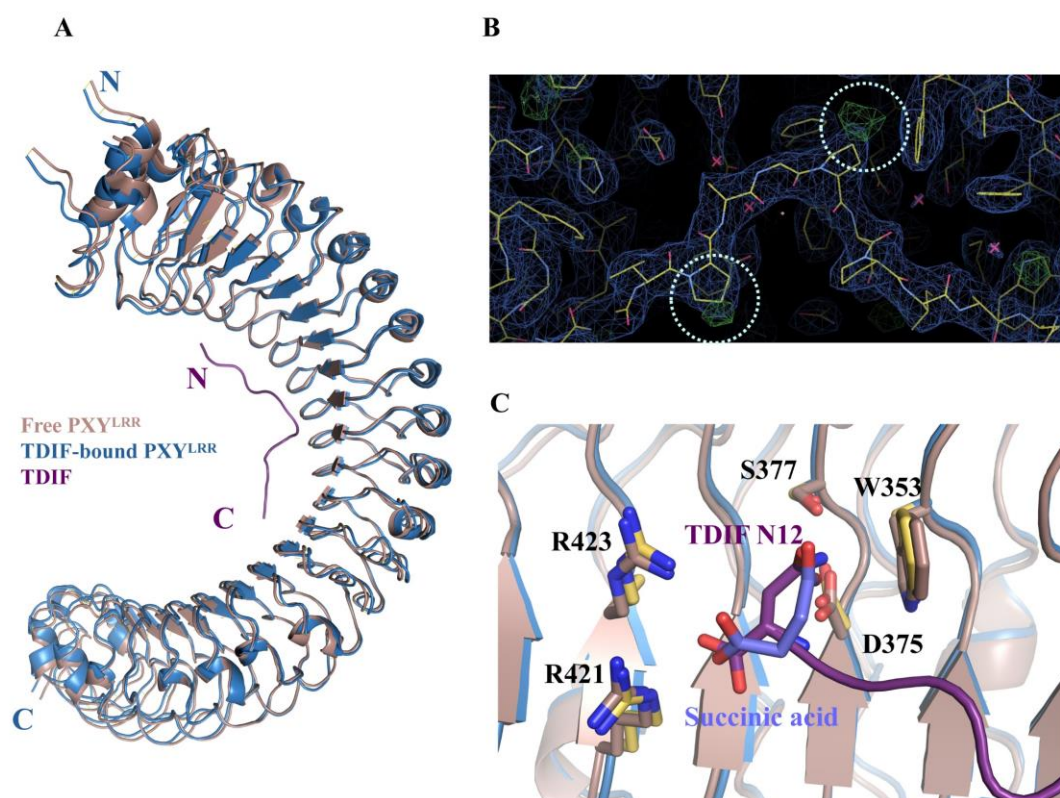

**Supplementary information, Figure S2** TDIF binding induces no obvious conformational changes in PXY. (A) Structural superposition of the PXY<sup>LRR</sup>-TDIF complex and PXY<sup>LRR</sup>. Free PXY<sup>LRR</sup> and TDIF-bound PXY<sup>LRR</sup> are colored in wheat and sky blue, respectively. (B) Electron density around TDIF in PXY<sup>LRR</sup>-TDIF complex. The model-phased map "2Fo-Fc" (blue) and the model-phased difference map "Fo-Fc" (green) around TDIF (in yellow) contoured at 1.30 sigma and 2.3 sigma (under COOT), respectively. White dashed circles indicate the hydroxyl groups of TDIF<sup>Hyp4</sup> and TDIF<sup>Hyp7</sup>. The hydroxyl groups of Hyp4 and Hyp7 were not included for map calculation. (C) Superposition of the succinic acid observed in ligand-free PXY<sup>LRR</sup> with TDIF<sup>Asn12</sup> in PXY<sup>LRR</sup>-TDIF complex. The succinic acid, TDIF<sup>Asn12</sup> and its interacting residues are shown in stick.
