# Supplementary material for: Crystal structure of PXY-TDIF complex reveals a conserved recognition mechanism among CLE peptide-receptor pairs
Source: PubMed Central journal article supplement — Cell Res. 2016 Apr 8;26(5):543–55. doi: 10.1038/cr.2016.45 (PMC4856767; doi:10.1038/cr.2016.45), 2016-04-08
Supplement: cr201645x3.pdf [file cr201645x3.pdf]

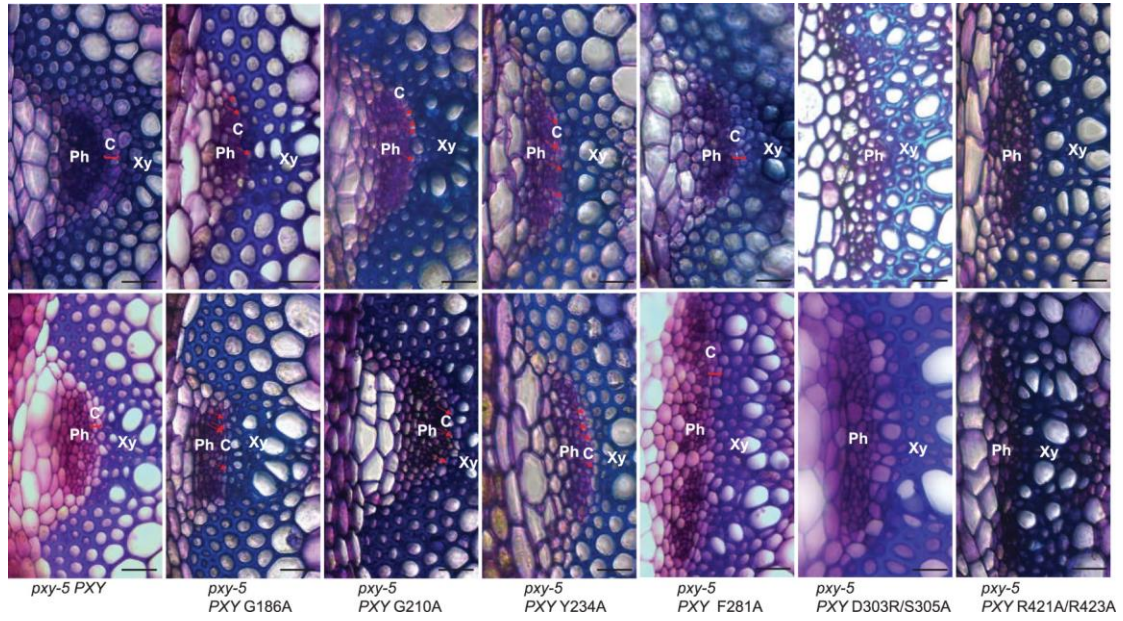

**Supplementary information, Figure S3** Results of complementation assay of other two independent lines of PXY mutants. The assays were performed as described in Figure 5. Different cell types were labeled individually. Ph: phloem; C: cambium; Xy: xylem.
