# Supplementary material for: Crystal structure of PXY-TDIF complex reveals a conserved recognition mechanism among CLE peptide-receptor pairs
Source: PubMed Central journal article supplement — Cell Res. 2016 Apr 8;26(5):543–55. doi: 10.1038/cr.2016.45 (PMC4856767; doi:10.1038/cr.2016.45), 2016-04-08
Supplement: cr201645x4.pdf [file cr201645x4.pdf]

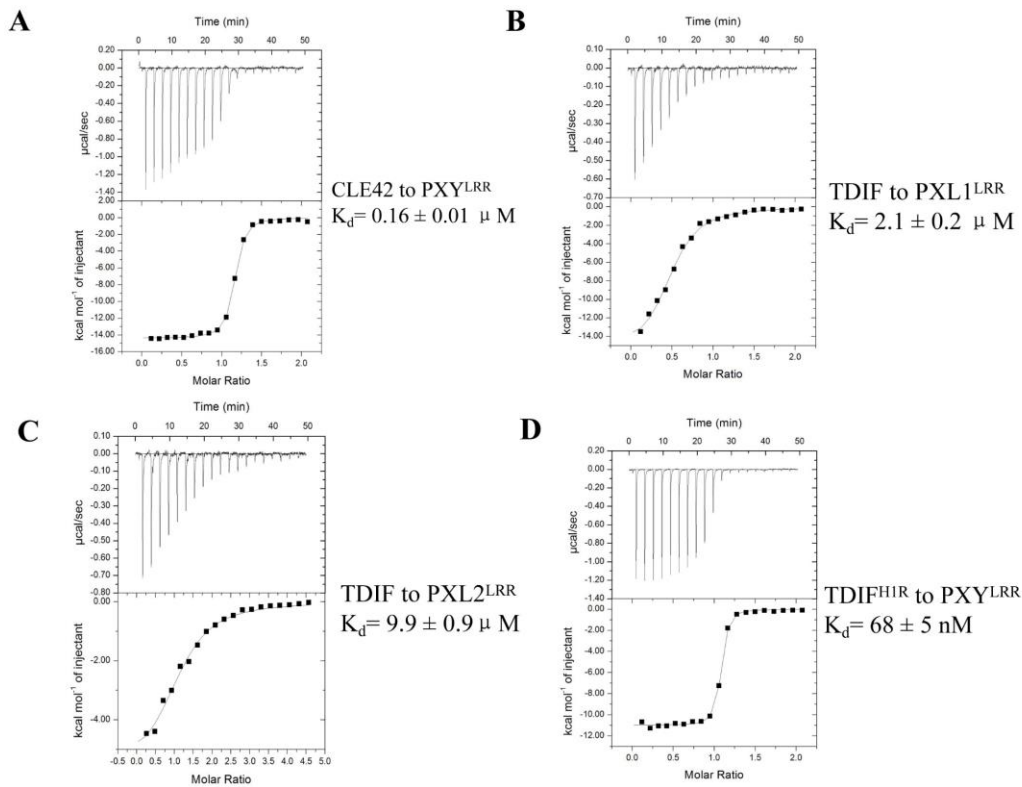

**Supplementary information, Figure S4** Quantification of binding affinities of TDIF/CLE42 with PXY<sup>LRR</sup>, PXL1<sup>LRR</sup> or PXL2<sup>LRR</sup> by ITC. (A), (B), (C) and (D) are raw data for the ITC experiments for the CLE42-PXY<sup>LRR</sup>, TDIF-PXL1<sup>LRR</sup>, TDIF-PXL2<sup>LRR</sup> and TDIF<sup>H1R</sup>-PXY<sup>LRR</sup> interaction, respectively.
