# Supplementary material for: Crystal structure of PXY-TDIF complex reveals a conserved recognition mechanism among CLE peptide-receptor pairs
Source: PubMed Central journal article supplement — Cell Res. 2016 Apr 8;26(5):543–55. doi: 10.1038/cr.2016.45 (PMC4856767; doi:10.1038/cr.2016.45), 2016-04-08
Supplement: cr201645x5.pdf [file cr201645x5.pdf]

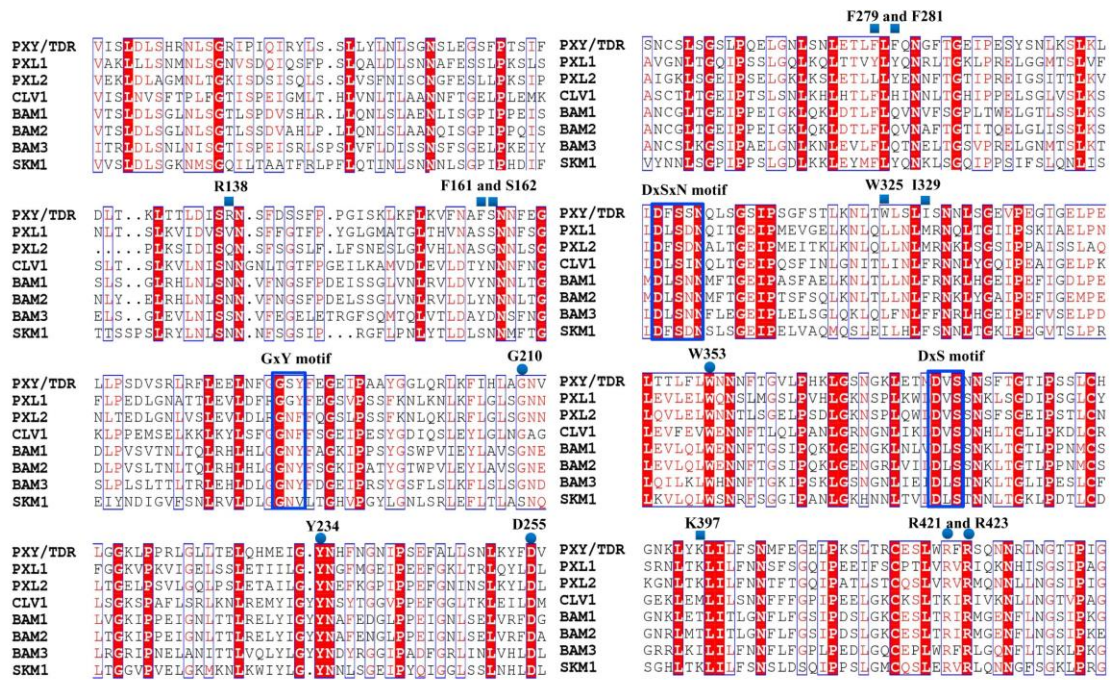

**Supplementary information, Figure S5** Sequence alignment of the extracellular LRR domains from other known CLE receptors. Conserved and non-conserved residues involved in interaction with TDIF are indicated with blue solid circles and squares at the top, respectively. Conserved motifs are boxed with blue frames.
