# Supplementary material for: Crystal structure of PXY-TDIF complex reveals a conserved recognition mechanism among CLE peptide-receptor pairs
Source: PubMed Central journal article supplement — Cell Res. 2016 Apr 8;26(5):543–55. doi: 10.1038/cr.2016.45 (PMC4856767; doi:10.1038/cr.2016.45), 2016-04-08
Supplement: cr201645x6.pdf [file cr201645x6.pdf]

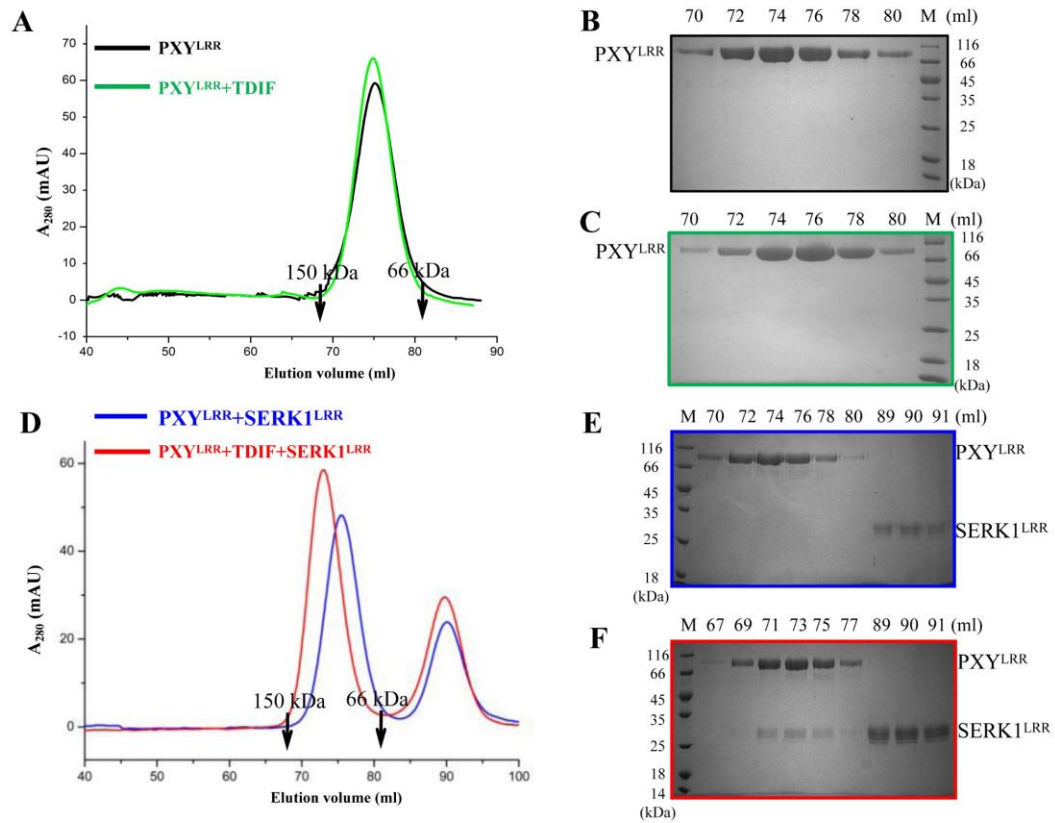

**Supplementary information, Figure S6** TDIF induces PXY<sup>LRR</sup> and SERK1<sup>LRR</sup> interaction in *vitro*. (A-C) TDIF induces no PXY<sup>LRR</sup> homodimerization. Right: Coomassie blue staining of the peak fractions shown on the left following SDS-PAGE. (D-F) TDIF induces PXY<sup>LRR</sup> and SERK1<sup>LRR</sup> heterodimerization. Right: Coomassie blue staining of the peak fractions shown on the left following SDS-PAGE. “M”: molecular weight ladder (kDa).
