# Supplementary material for: Crystal structure of PXY-TDIF complex reveals a conserved recognition mechanism among CLE peptide-receptor pairs
Source: PubMed Central journal article supplement — Cell Res. 2016 Apr 8;26(5):543–55. doi: 10.1038/cr.2016.45 (PMC4856767; doi:10.1038/cr.2016.45), 2016-04-08
Supplement: cr201645x7.pdf [file cr201645x7.pdf]

**Supplementary information, Table S1** Data collection and refinement statistics.

**Table S1. Data collection and refinement statistics.**

|                              | PXY                               | PXY-TDIF                          |
|------------------------------|-----------------------------------|-----------------------------------|
| <b>Wavelength (Å)</b>        | 0.979                             | 0.979                             |
| <b>Resolution range (Å)</b>  | 40.9-3.24 (3.36-3.24)             | 39.9-2.77 (2.87-2.77)             |
| <b>Space group</b>           | P 4 <sub>1</sub> 2 <sub>1</sub> 2 | P 4 <sub>1</sub> 2 <sub>1</sub> 2 |
| <b>Unit cell</b>             | 92.8 92.8 255.3<br>90 90 90       | 93.7 93.7 228.7<br>90 90 90       |
| <b>Unique reflections</b>    | 18344 (1776)                      | 26768 (2598)                      |
| <b>Completeness (%)</b>      | 99.22 (97.96)                     | 99.75 (99.65)                     |
| <b>Mean I/sigma (I)</b>      | 12.9 (5.2)                        | 15.5 (5.3)                        |
| <b>redundancy</b>            | 6.2 (6.4)                         | 5.4 (5.5)                         |
| <b>Rsym (%)</b>              | 14.8 (55.9 )                      | 14.1 (49.1)                       |
| <b>Rwork</b>                 | 0.213 (0.309)                     | 0.187 (0.246)                     |
| <b>Rfree</b>                 | 0.256 (0.388)                     | 0.242 (0.328)                     |
| <b>Water</b>                 | 0                                 | 87                                |
| <b>Protein residues</b>      | 595                               | 607                               |
| <b>R.m.s.d (bonds)</b>       | 0.013                             | 0.011                             |
| <b>R.m.s.d (angles)</b>      | 2.07                              | 1.30                              |
| <b>Ramachandran favored</b>  | 85%                               | 91%                               |
| <b>Ramachandran allowed</b>  | 13.3%                             | 9%                                |
| <b>Ramachandran outliers</b> | 1.7%                              | 0%                                |
| <b>Average B-factor</b>      | 75.20                             | 47.70                             |

$R_{sym} = \frac{\sum_h \sum_i |I_{h,i} - I_h|}{\sum_h \sum_i I_{h,i}}$ , where  $I_h$  is the mean intensity of the  $i$  observations of symmetry related reflections of  $h$ .  $R = \frac{\sum |F_{obs} - F_{calc}|}{\sum F_{obs}}$ , where  $F_{obs} = F_p$ , and  $F_{calc}$  is the calculated protein structure factor from the atomic model. The programs HKL2000 [36] and Phenix [39] were used for data processing and structure refinement, respectively. R.m.s.d. in bond lengths and angles are the deviations from ideal values.
