# Supplementary material for: Crystal structure of PXY-TDIF complex reveals a conserved recognition mechanism among CLE peptide-receptor pairs
Source: PubMed Central journal article supplement — Cell Res. 2016 Apr 8;26(5):543–55. doi: 10.1038/cr.2016.45 (PMC4856767; doi:10.1038/cr.2016.45), 2016-04-08
Supplement: cr201645x8.pdf [file cr201645x8.pdf]

**Supplementary information, Table S2** CLE peptides and their known receptors (mentioned in our manuscript).

**Table S2**

| Peptides        | Receptors      | References |
|-----------------|----------------|------------|
| TDIF (CLE41/44) | PXY/TDR        | 16, 18     |
| CLV3            | CLV1           | 5          |
| CLE2            | CLV1?          | 41         |
| CLE9            | BAM1           | 29         |
| CLE45           | SKM1?<br>BAM3? | 12<br>42   |
